# Supplementary material
Source: publisher figshare collection journal article supplement (https://acs.figshare.com/ndownloader/files/15206975)
Supplement: Supplementary file 1 [file 15206975]

## **Title**

**Improved polycyclic aromatic hydrocarbons and n-alkanes determination in speleothems through cleanroom sample processing**

## **Authors**

Elena Argiriadis<sup>1\*</sup>, Rhawn F. Denniston<sup>2</sup>, Carlo Barbante<sup>1,3</sup>

## **Affiliation**

<sup>1</sup>Ca' Foscari University of Venice, Department of Environmental Sciences, Informatics and Statistics, Via Torino 155, 30172 Venice, Italy

<sup>2</sup>Cornell College, Department of Geology, 600 First Street SW Mount Vernon, IA 52314-1098, USA

<sup>3</sup>Institute for the Dynamics of Environmental Processes CNR-IDPA, Via Torino 155, 30172 Venice, Italy

\*Corresponding author, email: elena.argi@unive.it, telephone: +39 041 234 8658, ORCID iD: 0000-0001-7227-405X

## Cave sediments extraction procedure and PAH results

Samples were freeze-dried and extracted by means of a Dionex Thermo Fisher ASE 350 accelerated solvent extractor at 100 °C and 1000 psi with a 1:1 mixture of dichloromethane and *n*-hexane (3 cycles, 5 min static). Extracts were concentrated under a gentle nitrogen stream. The instrumental analysis of PAHs was conducted as described in the main text for the calcite samples. Quantification was performed through the isotope dilution technique using <sup>13</sup>C-labeled internal standards (phenanthrene, acenaphthylene and benzo(*a*)pyrene) and corrected by the response factor. Results were blank corrected and divided by the samples weight. Values are in ng g<sup>-1</sup>.

**Table S1.** Concentrations (ng g<sup>-1</sup>) of target PAHs in cave sediments.

| PAH                    | Sample 1 | Sample 2 | Sample 3 | Sample 4 | Sample 5 | Sample 6 | Sample 7 | Sample 8 | Sample 9 | Sample 10 |
|------------------------|----------|----------|----------|----------|----------|----------|----------|----------|----------|-----------|
| Naphthalene            | 0.5      | 0.5      | 0.3      | 0.1      | 0.5      | 0.1      | 0.8      | 1        | 0.7      | 1         |
| Acenaphthylene         | nd        |
| Acenaphthene           | nd       | 1.6      | 0.6      | nd        |
| Fluorene               | nd       | nd       | 0.8      | nd       | nd       | nd       | nd       | 0.4      | nd       | 0.7       |
| Phenanthrene           | <lod     | <lod     | 5        | <lod     | <lod     | <lod     | <lod     | <lod     | 0.2      | 7.1       |
| Anthracene             | 0.4      | nd        |
| Fluoranthene           | <lod     | <lod     | 1        | <lod     | 0.1      | <lod     | 0.2      | <lod     | 0.0      | 0.8       |
| Pyrene                 | <lod     | <lod     | 0.4      | <lod     | <lod     | <lod     | 0.1      | <lod     | <lod     | 0.3       |
| Benzo(a)Anthracene     | nd        |
| Chrysene               | 0.2      | 0.1      | 0.3      | 0.4      | 0.4      | 0.1      | nd       | 0.1      | 0.1      | 0.2       |
| Retene                 | <lod     | 0.1      | nd       | nd       | 0.7      | 1.9      | nd       | 0.5      | 3        | nd        |
| Benzo(b)Fluoranthene   | nd        |
| Benzo(k)Fluoranthene   | nd        |
| Benzo(e)Pyrene         | nd       | nd       | nd       | nd       | 1        | nd       | nd       | 4        | 7        | 1         |
| Benzo(a)Pyrene         | 0.3      | 0.4      | nd       | 6        | 1        | 2        | nd       | 3        | 6        | <lod      |
| Perylene               | nd        |
| Benzo(ghi)Perylene     | nd        |
| Indeno(1,2,3-cd)Pyrene | nd       | 2         |
| Dibenzo(ah)Anthracene  | nd        |
